# Supplementary material for: The E/e’ ratio difference between subjects with type 2 diabetes and controls. A meta-analysis of clinical studies
Source: PubMed Central journal article supplement (PMC6307698; doi:10.1371/journal.pone.0209794), 2018-12-27
Supplement: pone.0209794.s004.pdf [file pone.0209794.s004.pdf]

|                 | Selection | Comparability | Exposure or Outcome |
|-----------------|-----------|---------------|---------------------|
| Andersson 2010  | +         | +             | +                   |
| Atas 2014       | +         | +             | ?                   |
| Bakirci 2015    | +         | +             | ?                   |
| Ceyhan 2012     | +         | +             | +                   |
| çiftel 2012     | ?         | ?             | ?                   |
| Conte 2013      | +         | ?             | ?                   |
| Erdogan 2013    | ?         | ?             | ?                   |
| Ernande 2011    | +         | +             | ?                   |
| Govind 2007     | ?         | ?             | ?                   |
| Loncarevic 2016 | ?         | +             | +                   |
| Mogelvang 2009  | ?         | ?             | +                   |
| Tayebjee 2005   | +         | +             | ?                   |
| Tayyareci 2010  | +         | +             | ?                   |
| Vukomovic 2017  | ?         | ?             | ?                   |
| Yazici 2008     | +         | ?             | ?                   |
