# Supplementary material for: The E/e’ ratio difference between subjects with type 2 diabetes and controls. A meta-analysis of clinical studies
Source: PubMed Central journal article supplement (PMC6307698; doi:10.1371/journal.pone.0209794), 2018-12-27

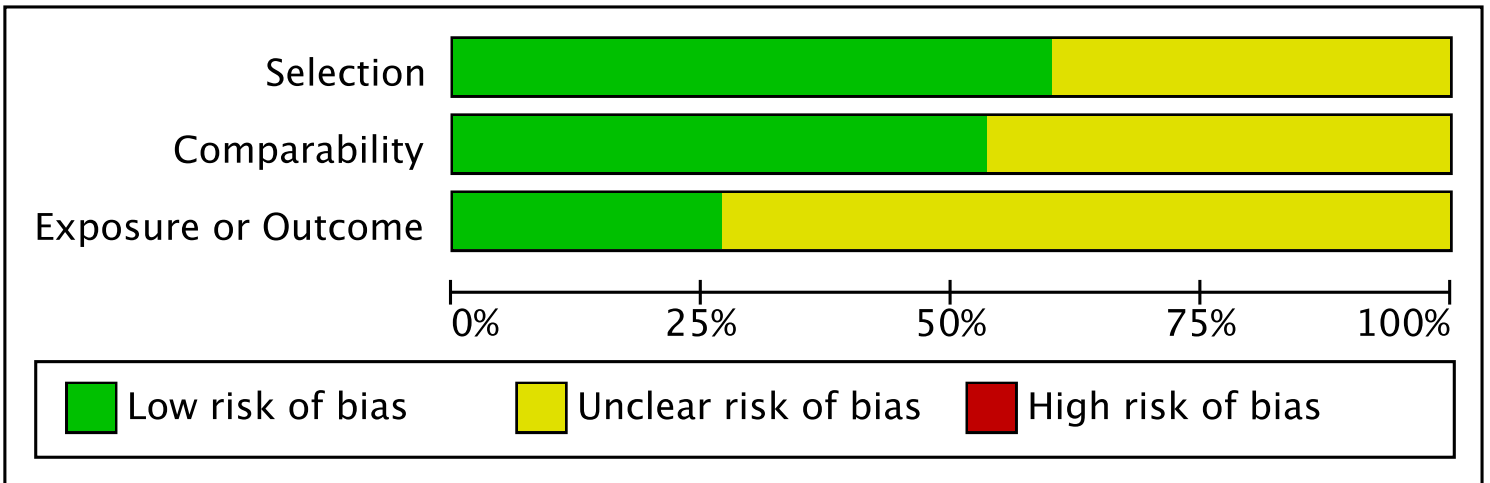

Supplement: pone.0209794.s005.pdf [file pone.0209794.s005.pdf]
